# Supplementary material for: Seasonal cycles of fluorescent biological aerosol particles in boreal and semi-arid forests of Finland and Colorado
Source: Copernicus journal article supplement (doi:10.5194/acp-13-11987-2013), 2013-12-11
Supplement: Supplementary file 1 [file acp-13-11987-2013-supplement.pdf]

1 **Supplementary Online Materials (SOM) for:**

2

3 **Title:**

4 Seasonal cycles of fluorescent biological aerosol particles in boreal and semi-arid forests of Finland and  
5 Colorado

6

7 **Authors:**

8 C. J. Schumacher<sup>1</sup>, C. Pöhlker<sup>2</sup>, P. Aalto<sup>3</sup>, V. Hiltunen<sup>3</sup>, T. Petäjä<sup>3</sup>, M. Kulmala<sup>3</sup>, U. Pöschl<sup>2</sup>, J. A.  
9 Huffman<sup>1,2\*</sup>

10

11 <sup>1</sup>Department of Chemistry and Biochemistry, University of Denver, Denver, Colorado, USA.

12 <sup>2</sup>Departments of Biogeochemistry and Multiphase Chemistry, Max Planck Institute for Chemistry, Mainz,  
13 Germany.

14 <sup>3</sup>Department of Physics, University of Helsinki, Helsinki, Finland.

15

16 \*Corresponding author: [alex.huffman@du.edu](mailto:alex.huffman@du.edu)

17

18 <http://www.atmos-chem-phys-discuss.net/13/17123/2013/acpd-13-17123-2013-discussion.html>

## 19 Supplemental Text

### 20 *SI.1 Diurnal Patterns*

21 At the Finland site the minimum FBAP concentration occurred between 9:00 – 12:00 local time (LT)  
22 during spring through fall and was shifted a few hours earlier in winter (Fig. S3). During winter, however,  
23 the concentration of particles was significantly lower, and so counting statistics were poor and average  
24 curves are noisy. The diurnal pattern of RH is smoother in each case than particle concentration and  
25 follows generally similar patterns of high values at night and lower values during the day. The timing of  
26 the RH and  $N_{F,c}$  peaks are not always aligned, however, and the  $N_{F,c}$  peak usually precedes the RH peak  
27 by several hours. The diurnal temperature cycle is inversely correlated to RH in all cases, the minima of  
28 which shifts later in the day during fall and winter (~7:00) as compared to spring and summer (~4:00).  
29 Figure S3 shows the 3  $\mu\text{m}$  mode was very narrow and predominant during spring, summer, and fall.  
30 During the winter, however, the peaks of the diurnal size distributions shift to 1.5  $\mu\text{m}$  at all hours of the  
31 day, with broader tail to both larger and smaller size. Figure S3d shows non-zero average particle  
32 concentration in sizes  $< 1 \mu\text{m}$  for all hours of the day, which was not the case for other seasons of the  
33 year, as was discussed in relation to the average size distribution (Fig. 3).

34  
35 Diurnal trends for FBAP at the Colorado site are broadly similar to those at the Finland site, but show less  
36 consistency in particle size and average timing of peaks. The diurnal pattern for summer and fall (Figs.  
37 S4b-c) show very similar patterns to each other. The concentration is lowest at 10:00, increases until  
38 15:00, remains stable for several hours and eventually reaches a daily maximum ~20:00. During the  
39 spring (Figure S4a), however,  $N_{F,c}$  peaks in the early morning (3:00) and decreases to a minimum in the  
40 late morning (10:00). A sharp peak at 12:00 is the result of the last few days of the season in June. As was  
41 the case for the Finland site, the wintertime diurnal averages (Fig. S4d) are noisy, reflecting low particle  
42 concentrations. The average diurnal trend of  $N_{F,c}$  is similar to other seasons, however, peaking in the  
43 evening and lowest in the middle of the day. Whereas the diurnal size distributions at the Finland site  
44 showed consistent peaks at 3  $\mu\text{m}$ , seasonal averages for the Colorado site show multiple modes that  
45 change as a function of time of day. In each season the predominant mode peaks at ~2  $\mu\text{m}$ , shifting  
46 slightly for each season. As with the pattern of  $N_{F,c}$ , the diurnal pattern of size distributions are very  
47 similar for summer and fall. Each season shows a broad mode peaking at 2.5  $\mu\text{m}$  in size, but spanning ~2-  
48 4  $\mu\text{m}$  and peaking at 20:00. As the concentration decreases through the night the smaller particles  
49 disappear, leaving a narrower mode at 4  $\mu\text{m}$ . The diurnal pattern in the spring is different from the trend  
50 later in the year, however, with two distinct modes at 2 and 5  $\mu\text{m}$ , each narrower than the modes observed  
51 during summer and fall. Also unique is the fact that the predominant mode at 2  $\mu\text{m}$  is somewhat smaller  
52 in particle size than the mode during summer and fall and that the mode peaks early in the morning (3:00)

53 instead of late evening. The 2  $\mu\text{m}$  mode then decreases in concentration, not returning until early evening.  
54 The 5  $\mu\text{m}$  mode, however, begins earlier in the afternoon and remains more constant throughout the day.  
55 The diurnal pattern in winter exhibits two similar modes at 2 and 6  $\mu\text{m}$ , but average concentrations are so  
56 low that they appear above the baseline ( $0.01 \text{ cm}^{-3}$ ) occasionally (Fig. S4d). Also important to note is that  
57 Figures S3-S4 show particle size distributions and concentrations averaged over entire seasons, and so  
58 only broad themes are visible here. Many individual modes (e.g. Fig. 3-4) appear for short periods of time  
59 and are thus not reflected in this format.

60

### 61 *SI.2 Precipitation Effects*

62 At the Colorado site, no precipitation was observed or recorded early on 26 July, 2011. Figure S7b shows  
63 the  $N_F$  size distribution in the hours before rain began to fall on 27 July, during the morning when the  
64 FBAP concentration is usually low. The distribution is relatively broad, peaking at  $\sim 3 \mu\text{m}$ , and the  
65 integrated  $N_{F,c}$  is  $0.02 \text{ cm}^{-3}$ . Immediately upon rain arrival, however, (Fig. S7a, red trace; 11:45)  $N_{F,c}$   
66 increases to  $0.49 \text{ cm}^{-3}$  and the size distribution becomes dominated by a narrower 2.05  $\mu\text{m}$  mode (Fig.  
67 S7c). In this case, as was common throughout the summer, the FBAP number increases with each  
68 individual rain event, even if separated only by a few minutes.

69

70 For FBAP data at the Colorado site data were separated into three periods and diurnal averages were  
71 calculated for each set independently. During periods without rain influence (Fig. S8c), FBAP  
72 concentration peaked at 3.65  $\mu\text{m}$  in the late evening (20:00 – 01:00), and remained relatively unchanged  
73 in particle size throughout the day. During rain events, however, the particle size peaked at 2.5  $\mu\text{m}$  at  
74 14:00, with a secondary peak at 17:00. Further, periods with after-rain influence still showed the 2.5  $\mu\text{m}$   
75 peak remaining at 14:00 and through the afternoon, though in lower concentration, but also showed the  
76 4.5  $\mu\text{m}$  mode stable from midnight and into the mid-morning. Periods with rain and after-rain influence  
77 were fewer than those of no rain influence, when looked at on a seasonal basis, and so averaging statistics  
78 (Figs. S8b,c) are poorer and traces are noisier. Other seasons at the Colorado site showed a similar pattern  
79 of FBAP relationship with rain, but the correlation was much weaker (Table 1).

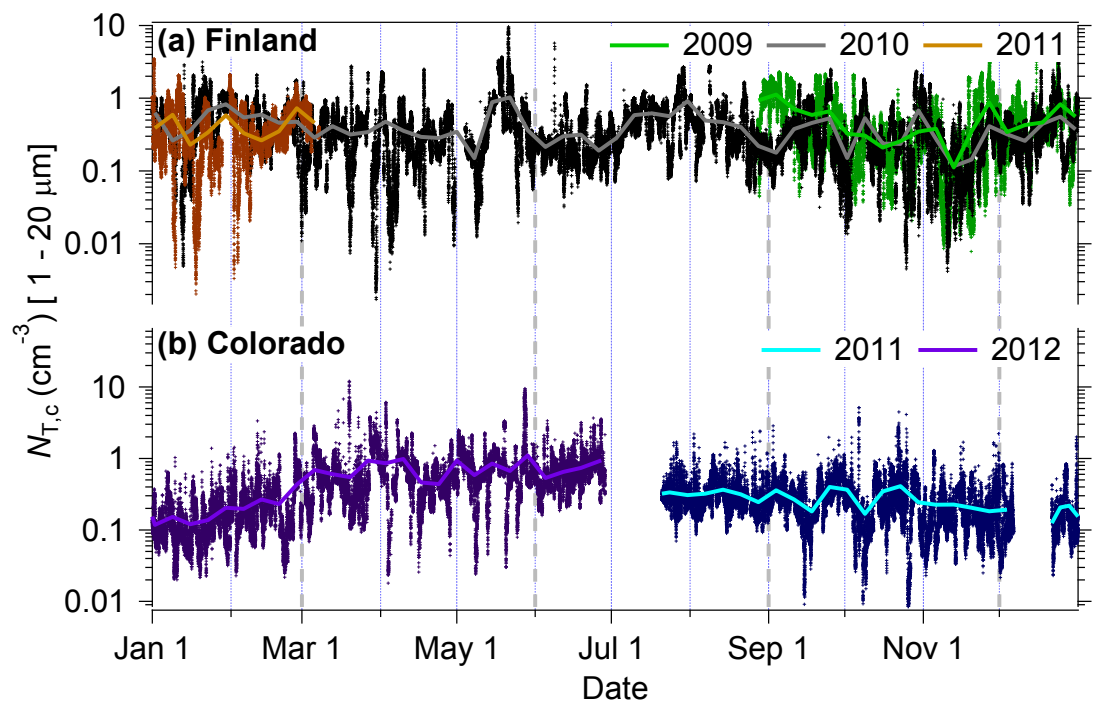

80  
 81 **Figure S1:** Overview of total particle concentration at each site. Small dots represent individual 5-minute  
 82 data points from UV-APS. Colored traces cutting through UV-APS data show 7-day mean values of  
 83 FBAP concentration, plotted on left axes. Axis ranges match in upper and bottom panels. Dashed vertical  
 84 lines show seasonal boundaries used for averaging (as discussed in Section 2.4).

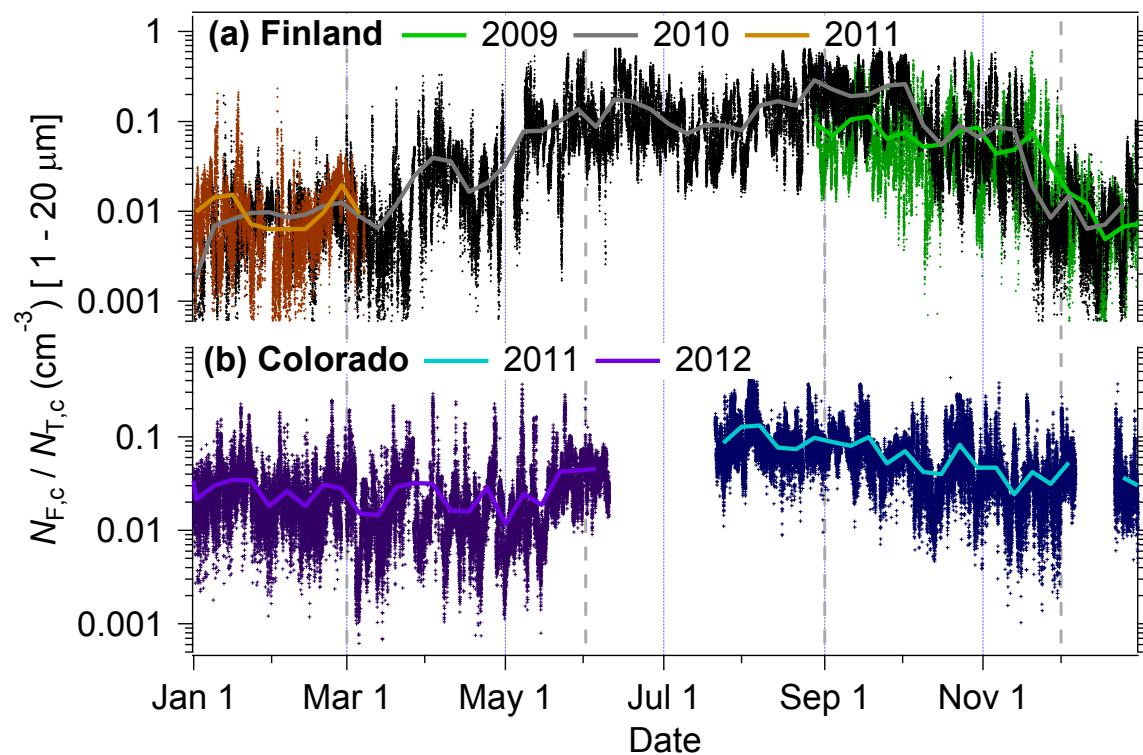

85  
 86 **Figure S2:** Overview of FBAP/total particle concentration ratio at each site. Small dots represent  
 87 individual 5-minute data points from UV-APS. Colored traces cutting through UV-APS data show 7-day  
 88 mean values of FBAP concentration, plotted on left axes. Axis ranges match in upper and bottom panels.  
 89 Dashed vertical lines show seasonal boundaries used for averaging (as discussed in Section 2.4)

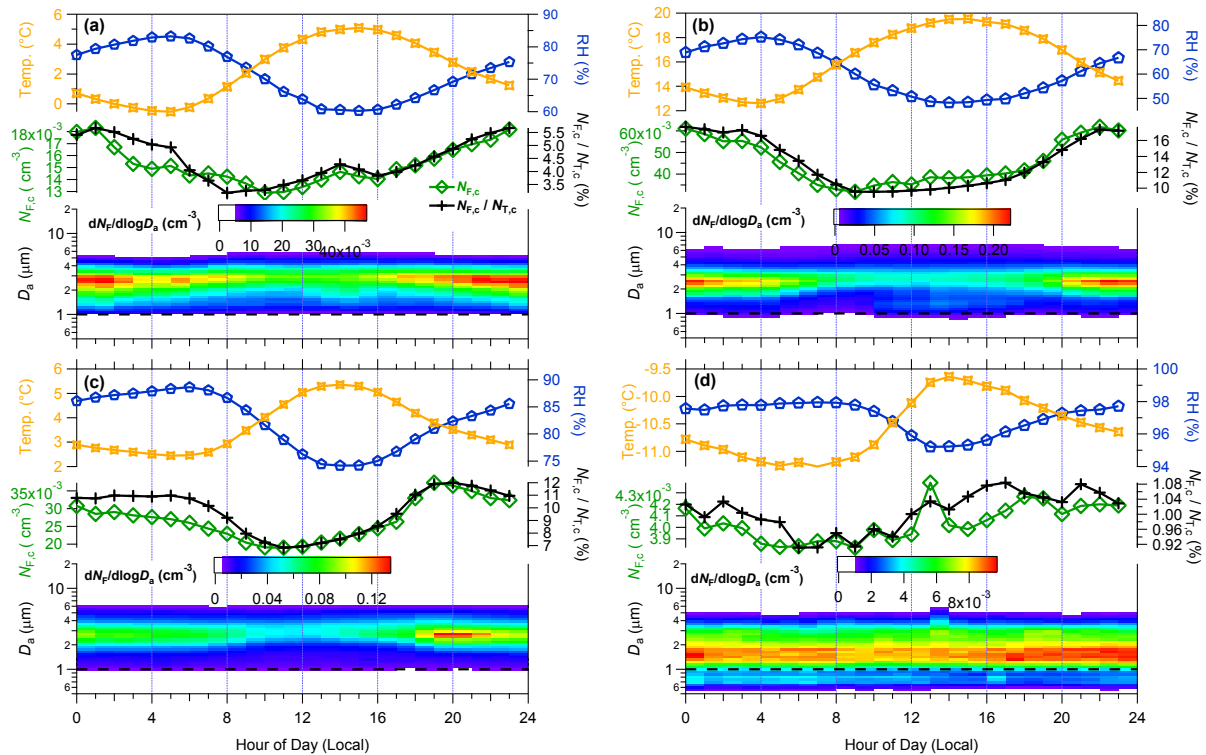

90

91 **Figure S3:** Seasonal diurnal trends of fluorescent particles measured at Finland site. FBAP concentration  
 92 (green), ratio of FBAP to total particle concentration (black), temperature (yellow), and relative humidity  
 93 (blue) plotted for each season: **(a)** spring, **(b)** summer, **(c)** fall, and **(d)** winter. White areas of image plot  
 94 show particle concentrations below arbitrary thresholds as shown in color scale. Horizontal dashed line  
 95 shows lower size limit use for particle number integration.

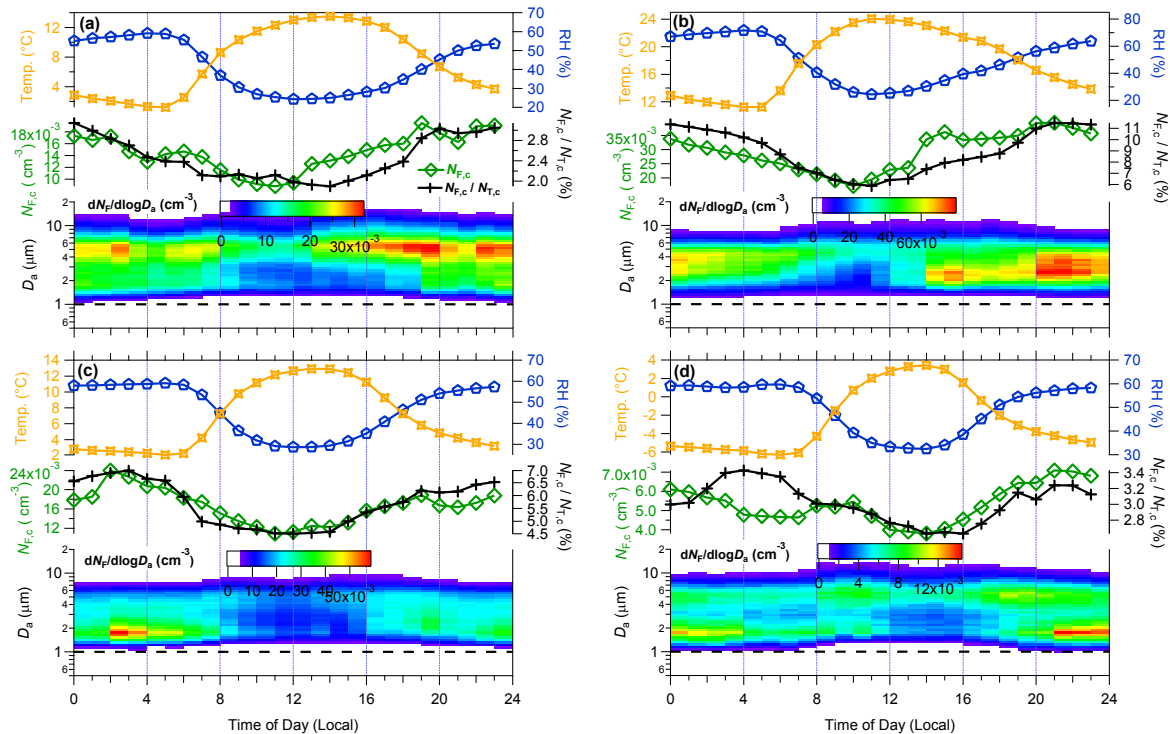

96

97 **Figure S4:** Seasonal diurnal trends of fluorescent particles at Colorado site. FBAP concentration (green),  
 98 ratio of FBAP to total particle concentration (black), temperature (yellow), and relative humidity (blue)  
 99 plotted for each season: **(a)** spring, **(b)** summer, **(c)** fall, and **(d)** winter. White areas of image plot show  
 100 particle concentrations below arbitrary thresholds shown in color scale. Horizontal dashed line shows  
 101 lower size limit use for particle number integration.

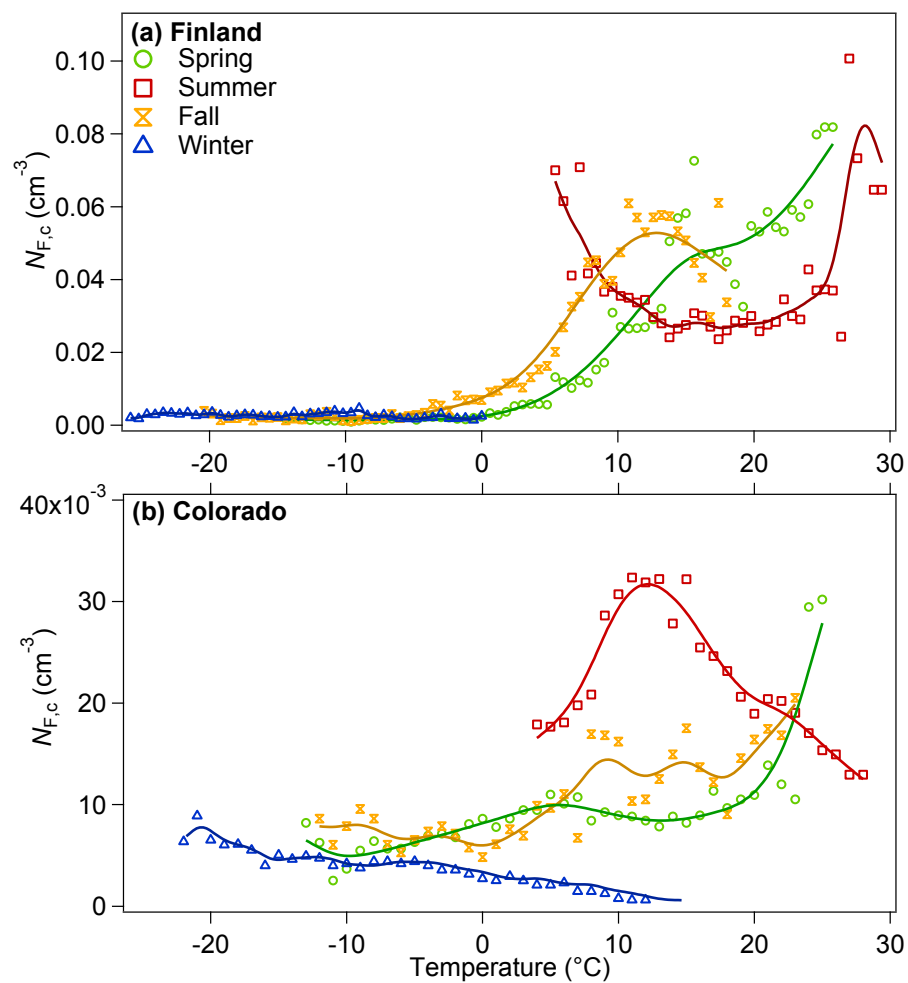

102

103 **Figure S5:** Median seasonal relationship between FBAP concentration and air temperature. Data  
 104 averaged into 100 bins. Bins that contained less than 0.01% of the total points were removed. **(a)** Finland  
 105 **(b)** Colorado. Fit lines are spline curves to guide the eye.



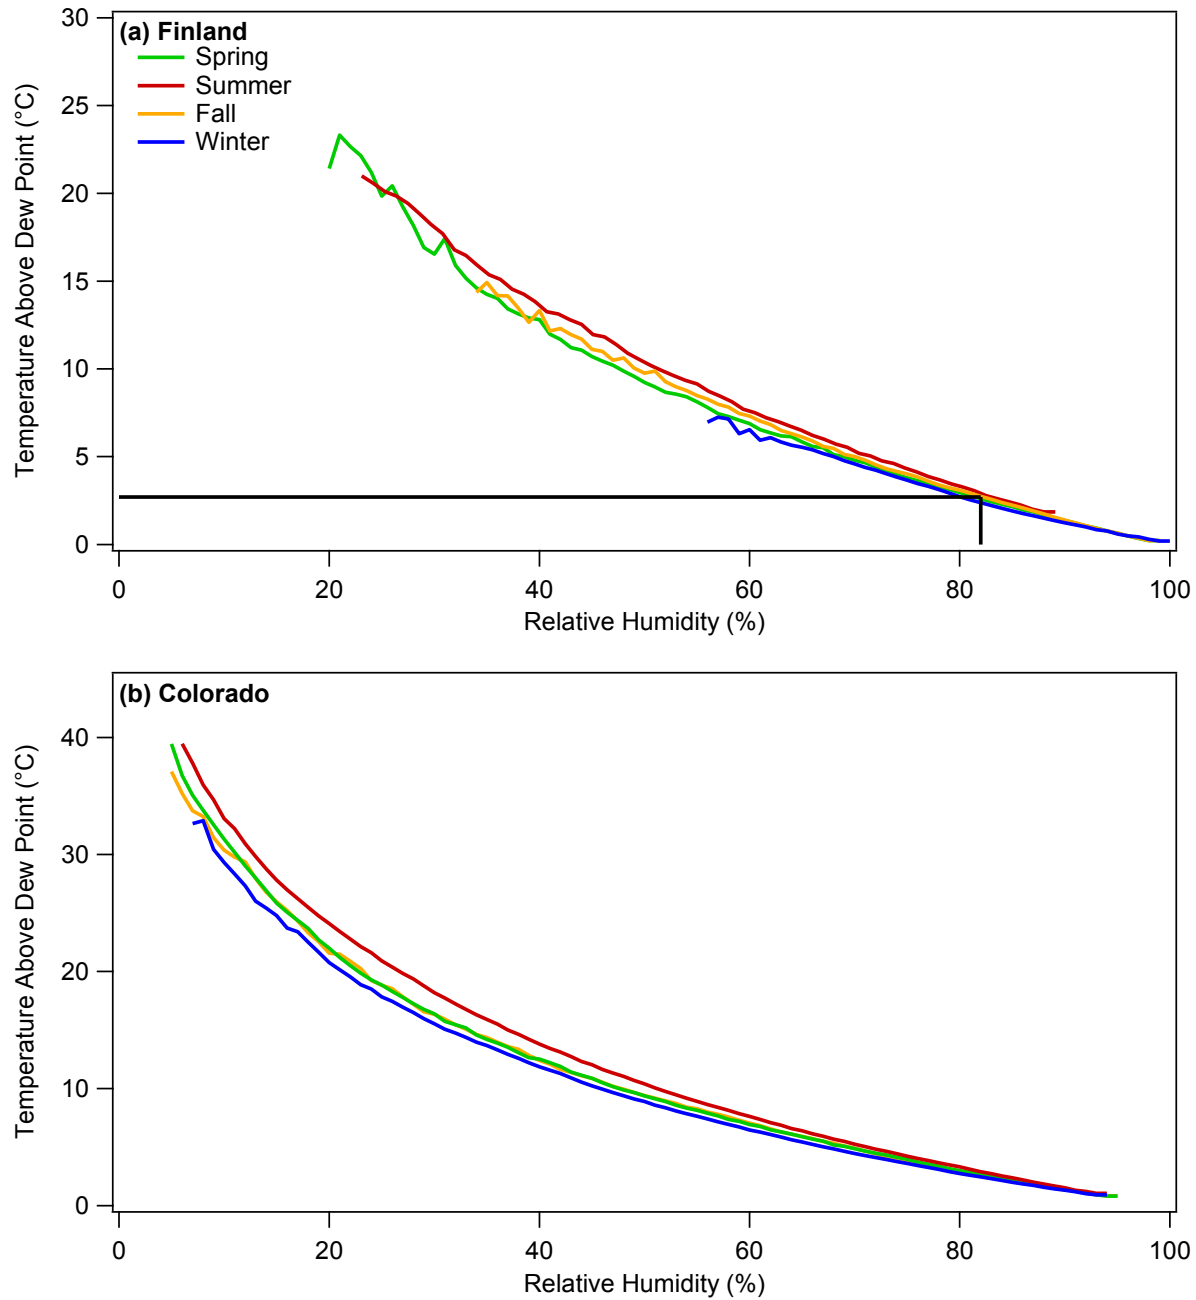

106

107 **Figure S6:** Relationship between RH and temperature above dew point, averaged per season at each site.

108 Black line in (a) indicates the point at which the FBAP concentration drops sharply (see Fig. 6). The

109 following equation was used to calculate the temperature above dew point:  $\gamma_m(T, RH) = \ln\left(\frac{RH}{100} \exp\left((b - \frac{T}{d})\left(\frac{T}{c+T}\right)\right)\right)$ ;

110  $T_{dp} = \frac{c\gamma_m(T, RH)}{b - \gamma_m(T, RH)}$ ; where  $a = 6.1121, b = 18.564, c = 255.57, d = 254.4$ .

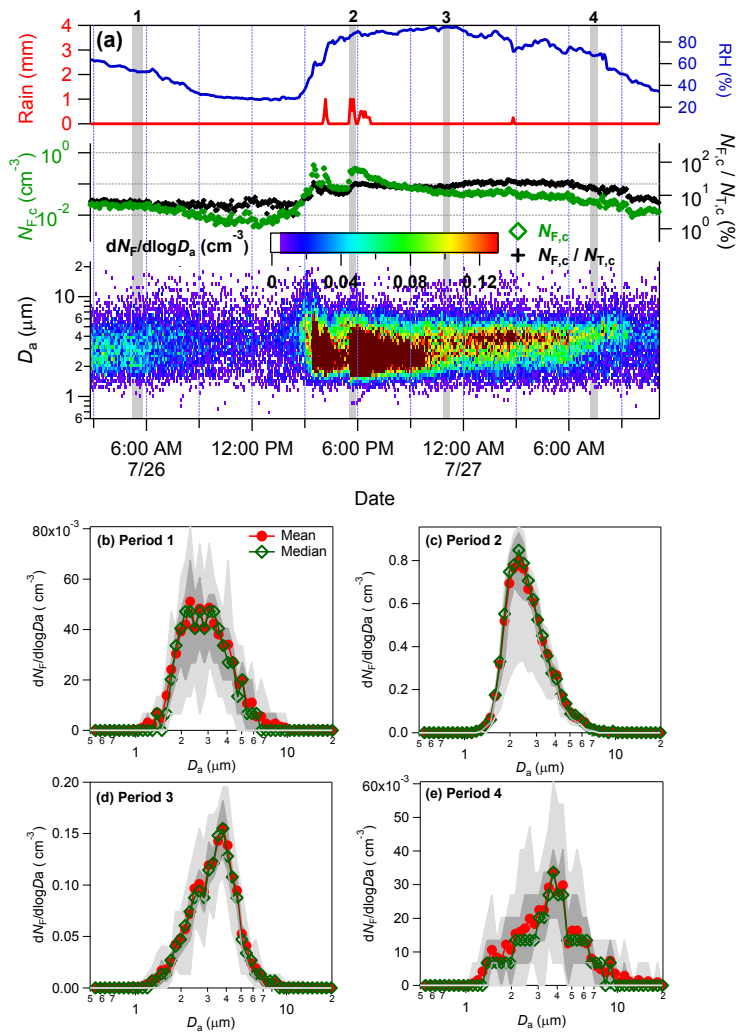

111

112 **Figure S7:** Example of rain influence on particle size and concentration at Colorado site. (a) Time series  
 113 of rain, RH, FBAP, FBAP/total particle ratio, and FBAP size distributions. Numbered gray bars correlate  
 114 to size distributions shown below. (b) Size distribution from period (1) before rain. (c) Size distribution  
 115 from period (2) during rain. (d) Size distribution from period (3) immediately after rain. (e) Size  
 116 distribution from period (4) after all rain, after-rain influence.

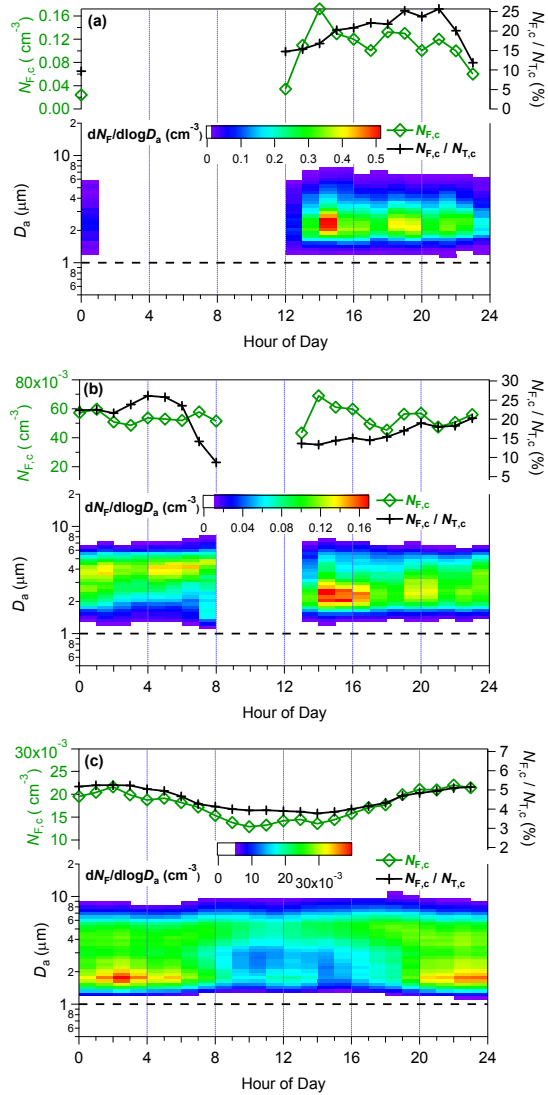

117

118 **Figure S8:** Diurnal averages of FBAP concentration and size distributions at Colorado site during

119 summer separated into periods: (a) during rain, (b) immediately after rain, and (c) without rain influence.

120 Averages shown here only for time periods with > 8 data points.

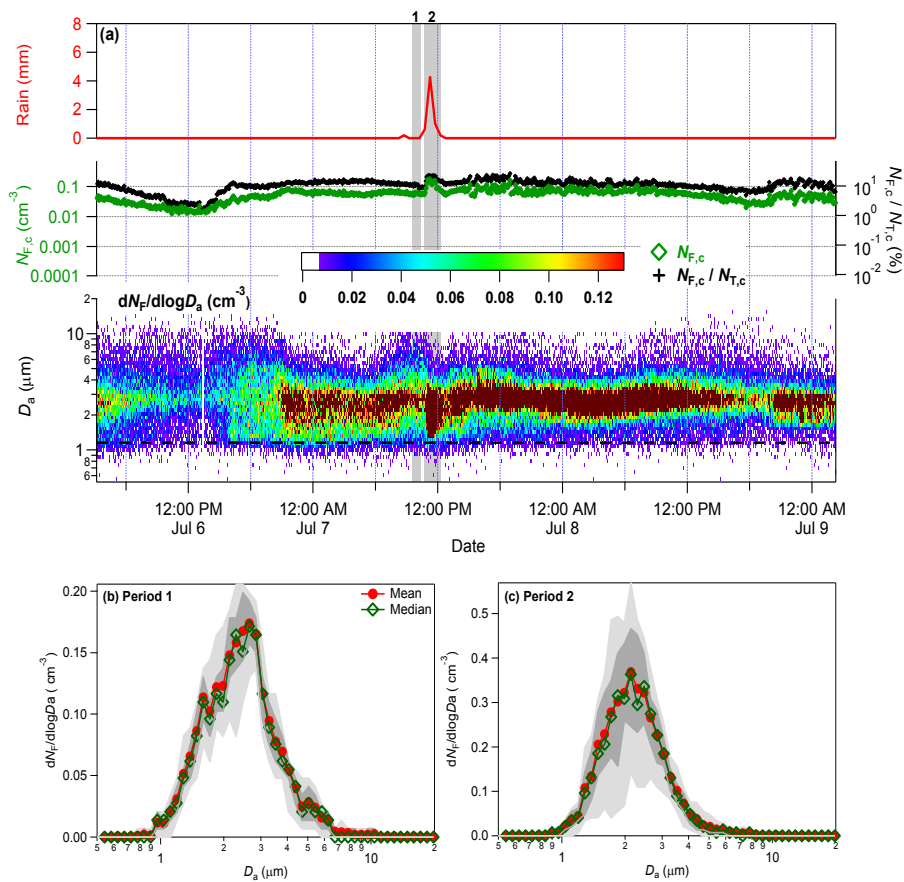

121  
 122 **Figure S9:** Example of rain influence on particle size and concentration at Finland site. **(a)** Time series of  
 123 rain, RH, FBAP, FBAP to total particle ratio, and FBAP size distributions. Numbered gray bars correlate  
 124 to size distributions below. **(b)** Size distribution from period (1) before rain. **(c)** Size distribution from  
 125 period (2) during rain.
